# Supplementary material for: Concordance and predictive value of two adverse drug event data sets
Source: Springer Nature journal article supplement (doi:10.1186/1472-6947-14-74), 2014-08-22

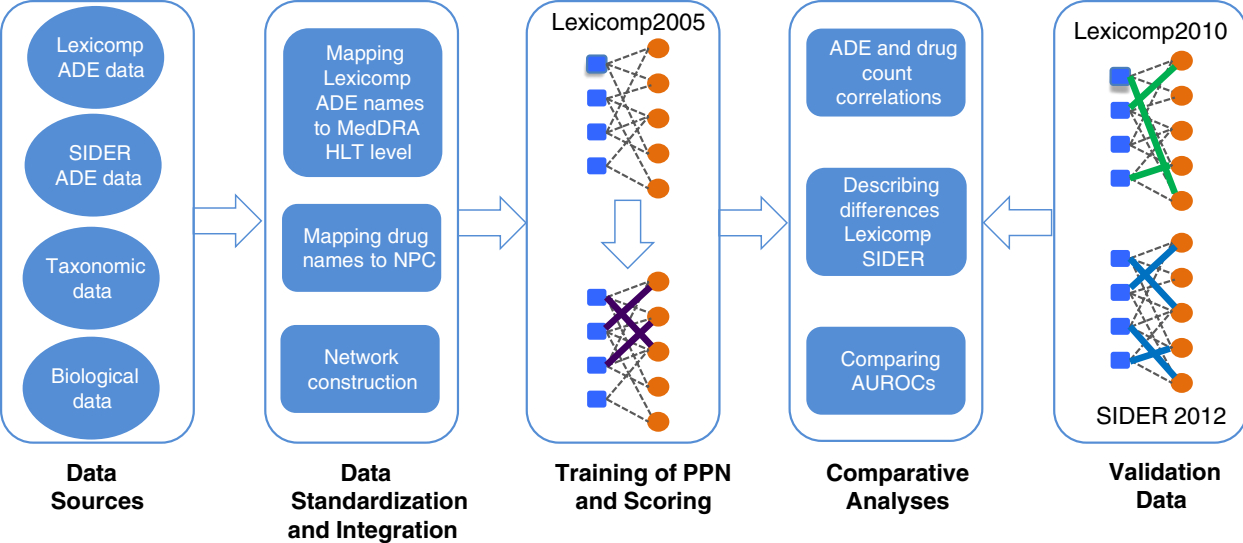

Supplement: 12911_2014_838_MOESM1_ESM.pdf [file 12911_2014_838_MOESM1_ESM.pdf]
